# Supplementary material for: Systematic testing and specificity mapping of alloantigen-specific chimeric antigen receptors in T regulatory cells
Source: JCI journal article supplement (doi:10.1172/jci.insight.123672), 2019-02-12
Supplement: sd1 [file 1]

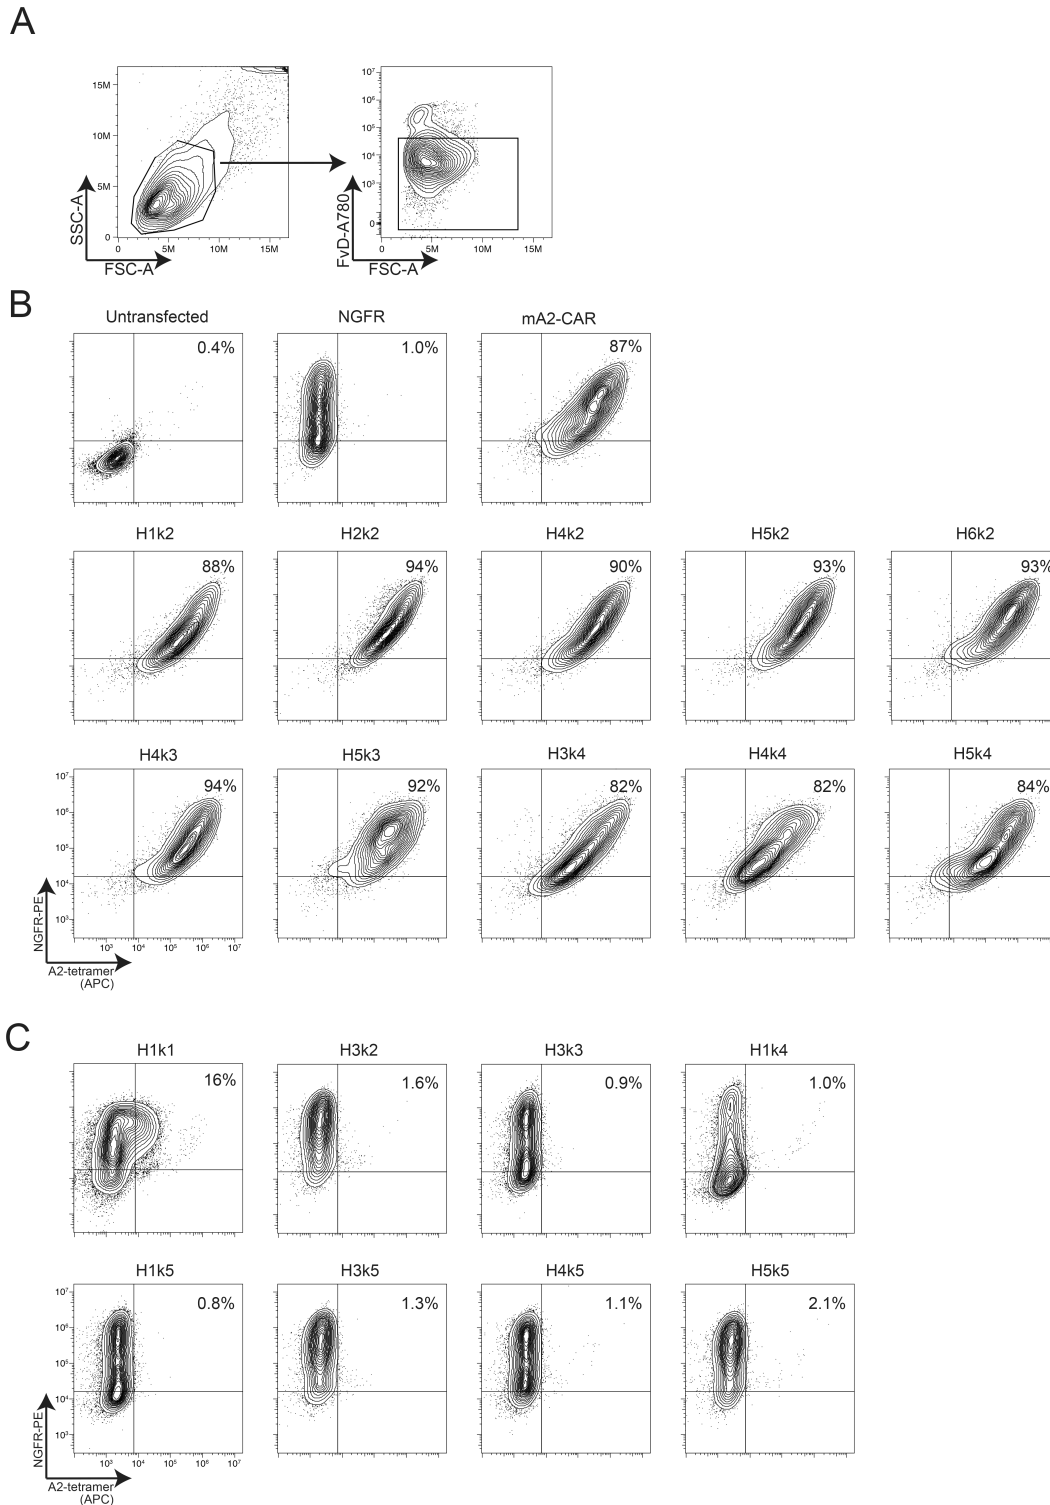

**Supplemental Figure 1. Cell surface expression and tetramer binding of hA2 CARs in 293T cells.** 293T cells were transiently transfected with the indicated constructs. 48 hours later, expression and tetramer binding were analysed by flow cytometry. The gating strategy is shown in (A). Representative flow plots are shown for constructs which do (B) or do not (C) retain their ability to bind to HLA-A\*02:01. Data are representative of two independent experiments.

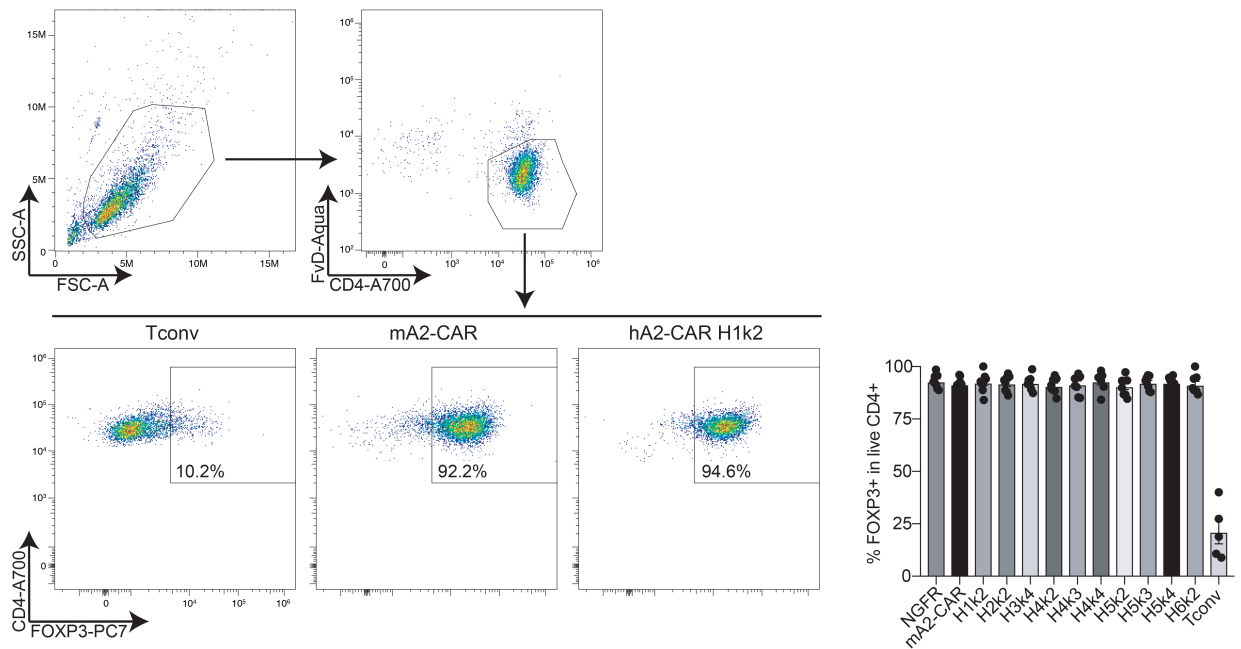

**Supplemental Figure 2. *FOXP3* expression on m/hA2-CAR Tregs after in vitro expansion.**

CAR Tregs and untransduced Tconv cells were expanded as described in the Methods. Prior to use in experiments the cells were analyzed for FOXP3 expression. The gating strategy and representative data are on the left, with averaged data on the right. Mean  $\pm$  SEM. n=5-9 pooled from at least 5 independent experiments.



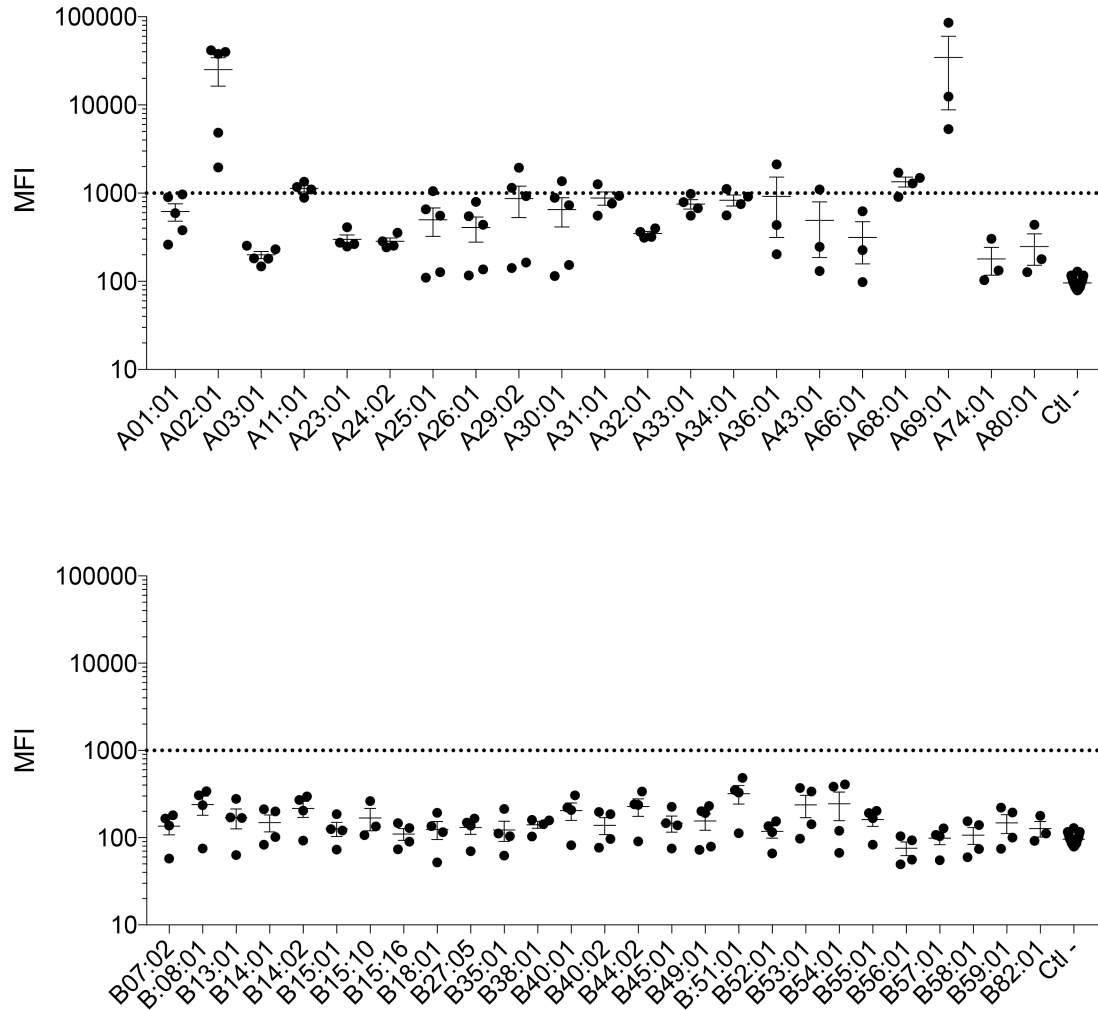

**Supplemental Figure 4. Cross-reactivity of BB7.2 mAb with other HLA-A allelic variants.**

FlowPRA beads were incubated with APC-conjugated BB7.2 monoclonal antibody (Thermo Fisher Scientific, 17-9876-41) as recommended by manufacturer, and then analyzed by flow cytometry. Mean fluorescence intensity (MFI) of the reporter anti-FITC human IgG antibody is shown. Higher MFI indicates binding to the indicated HLA alleles. n=3-5 from 2-3 independent experiments.

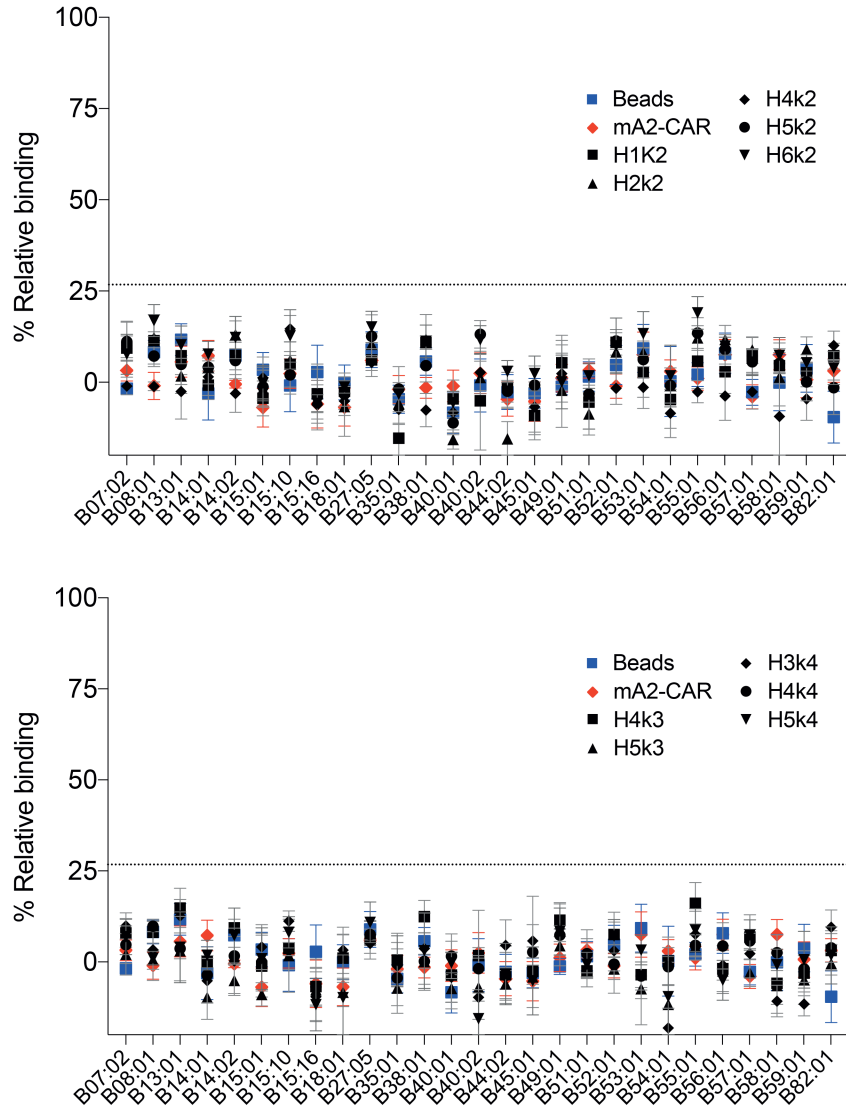

**Supplemental Figure 5. Cross-reactivity of m/hA2 CARs with common HLA-B allelic variants.** NGFR control, m/hA2-CAR Tregs were incubated with HLA-B single antigen FlowPRA beads, analyzed and normalized as in Figure 3. Results shown are n=2-6 from at least 2 independent experiments.

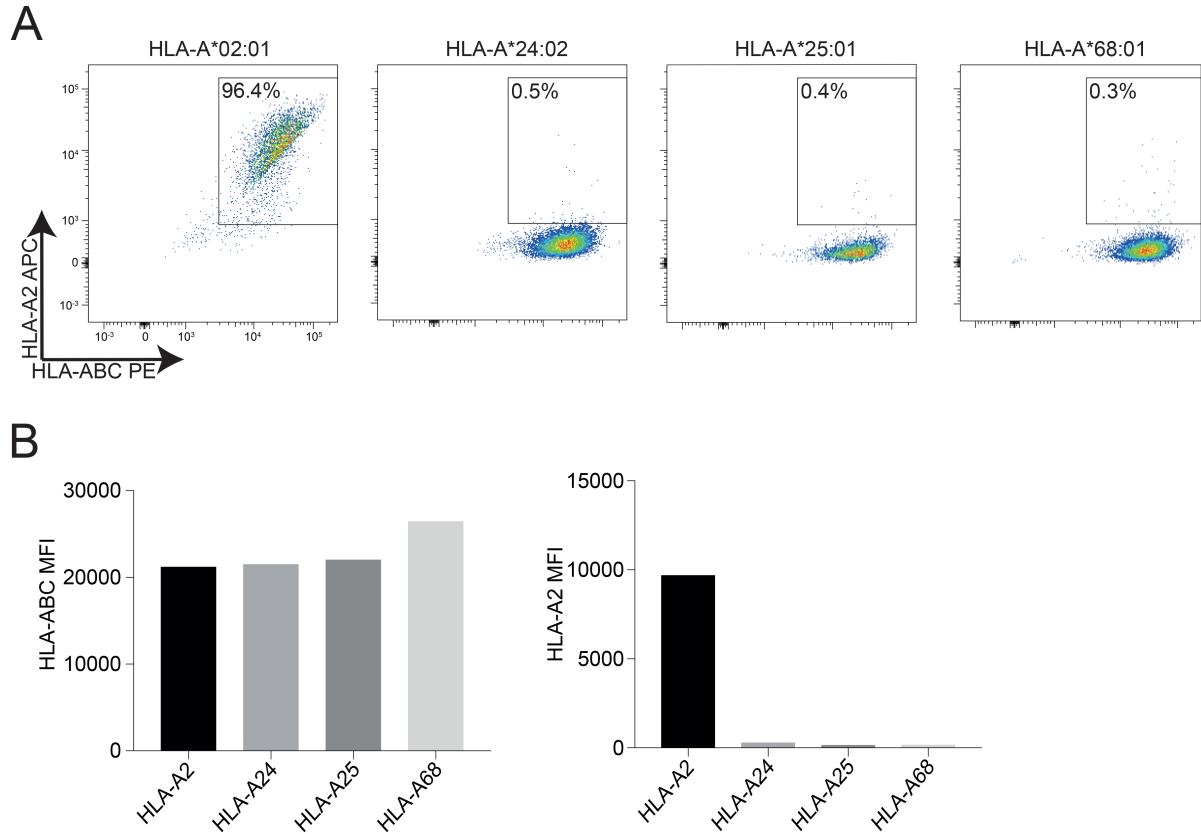

**Supplemental Figure 6. Characterization of K562 cells expressing HLA-A allelic variants. (A)** Representative flow cytometry plots from staining HLA-A2, A24, A25 and A68-expressing K562s with anti-HLA-ABC or anti-HLA-A2 (BB7.2 clone) mAbs. Gated on live cells. **(B)** Mean fluorescence intensity of HLA-ABC (left) and HLA-A2 (right) for each K562 cell line.

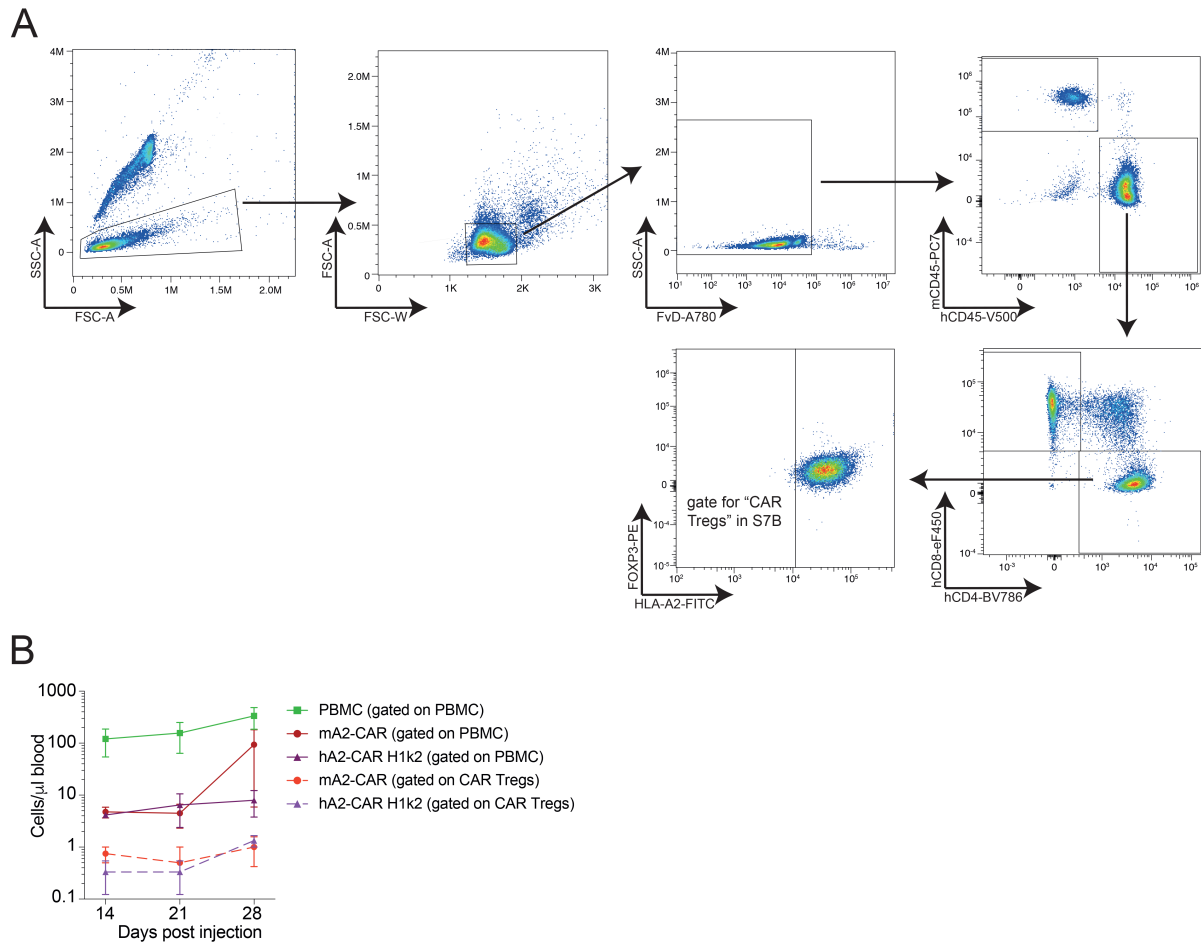

**Supplemental Figure 7. *In-vivo* cell tracking after adoptive transfer in a xenogeneic GVHD mouse model.** Irradiated NSG mice were injected with cells as described in Figure 5B-D. **(A)** Gating strategy to measure human CD45<sup>+</sup> and CAR Treg (hCD45<sup>+</sup>hCD4<sup>+</sup>HLA-A2<sup>-</sup>) cell engraftment. Shown are representative data from a PBMC + H1k2-CAR Treg mouse. **(B)** Absolute number of PBMC and CAR Treg engraftment per  $\mu$ L of blood over time. Number of PBMCs were calculated as hCD45<sup>+</sup> minus CAR Treg counts, as gated in (A).

**A**

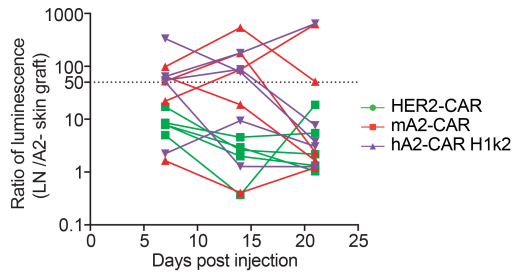

**B**

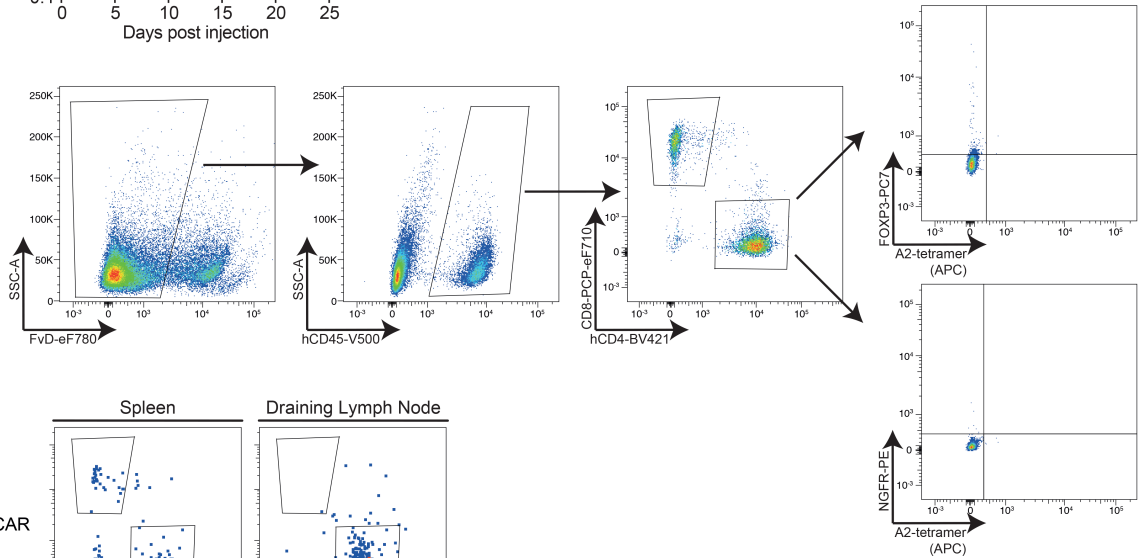

**C**

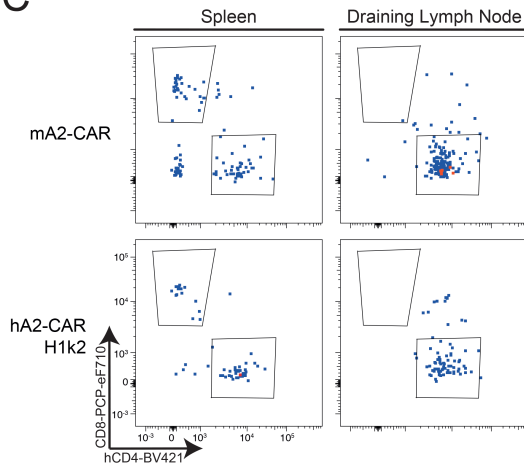

**D**

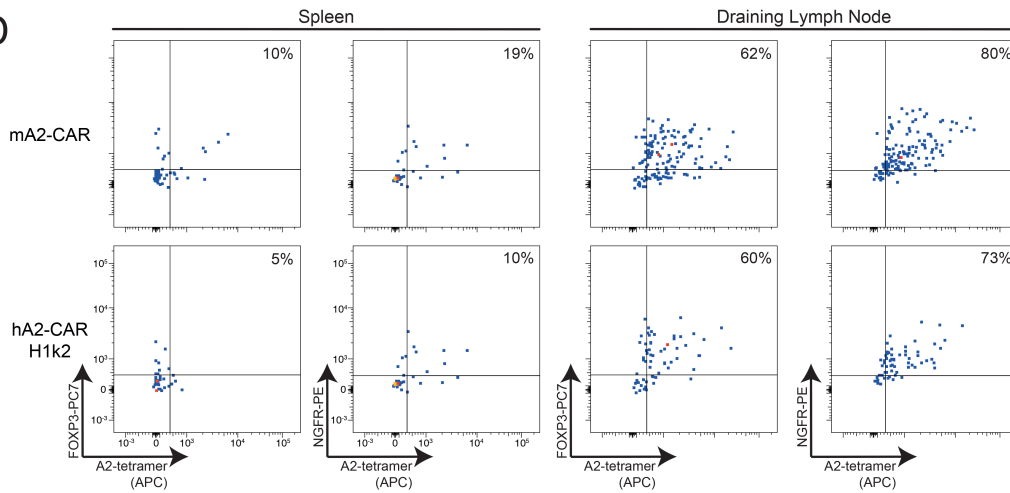



**Supplemental Figure 8. Trafficking of luciferase+ m/hA2 CAR Tregs to lymph nodes.** Tregs were co-transduced with lentivirus encoding luciferase and either HER2-CAR, mA2-CAR or hA2-CAR constructs, expanded and injected into transplanted NSG mice as in Figure 6. **(A)** Amount of luciferase radiance in the draining lymph node area was quantified using the average amount of photons/sec/cm<sup>2</sup>/steradian and plotted as a ratio between the lymph node area and the adjacent background signal from NSG (A2-negative) skin grafts over time. Each line represents one mouse from the indicated group. Points above the dotted line at 50 indicate a visually detectable signal. **(B)** Lymph nodes and spleen were harvested at Day 23 and analyzed using the indicated gating strategy with gates set on the basis of cells isolated from the spleen of mice injected with HER2-CAR Tregs. **(C&D)** Flow cytometry profiles of cells isolated from spleen or draining lymph nodes of the indicated mice. **(C)** Plots were pre-gated on FvD<sup>-</sup>hCD45<sup>+</sup> as in (A) and analyzed for proportion of hCD4/CD8 cells. **(D)** Flow cytometry plots were pre-gated as FvD<sup>-</sup>hCD45<sup>+</sup>CD4<sup>+</sup> cells and analyzed for proportions of FOXP3<sup>+</sup>CAR<sup>+</sup> cells using the gating strategy in Supplemental Figure 7. For B-D, n=1 per group from one independent experiment.

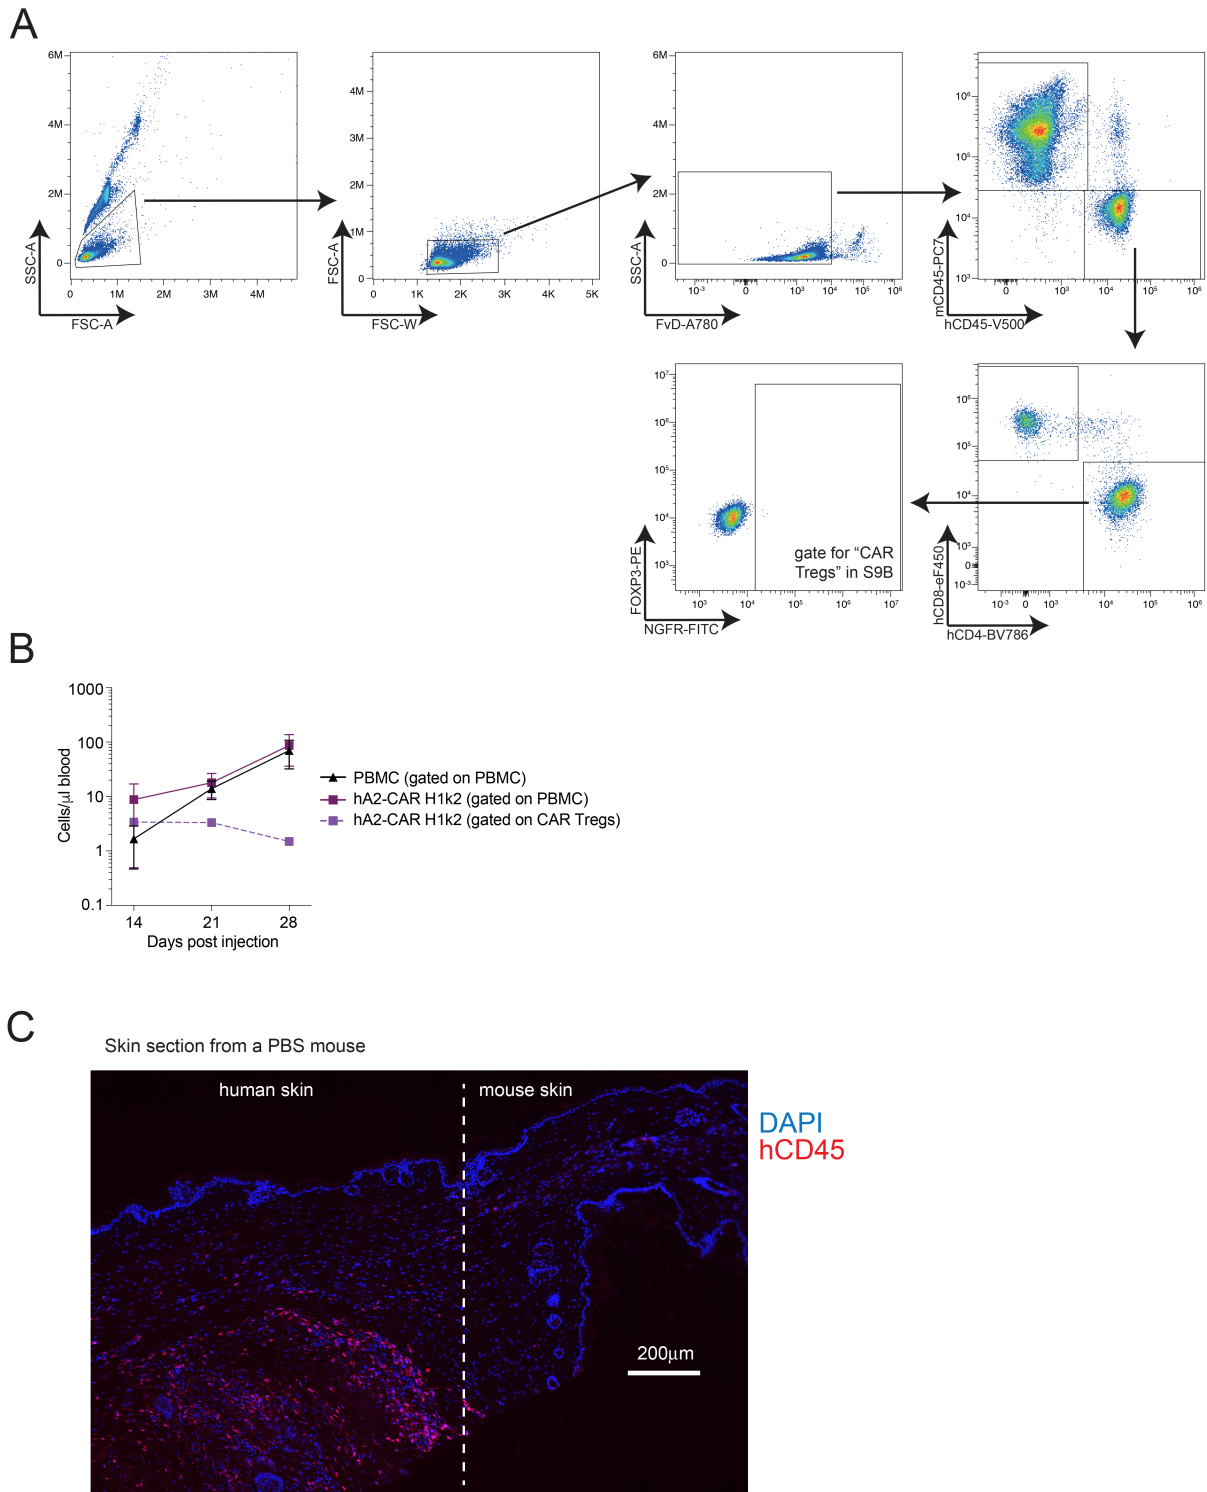

**Supplemental Figure 9. Tracking of hA2 CAR Tregs in the human skin transplant model.** NSG mice were transplanted with human HLA-A\*02<sup>+</sup> skin and injected with cells as described in Figure 7. **(A)** Gating strategy to measure human CD45<sup>+</sup> (PBMC) and CAR Treg

(hCD45<sup>+</sup>hCD4<sup>+</sup>NGFR<sup>+</sup>) cell engraftment, shown are representative data from a PBMC + hA2-CAR Treg mouse. **(B)** Absolute number of PBMCs and CAR Treg engraftment per  $\mu$ L of blood over time. Number of PBMCs were calculated as hCD45<sup>+</sup> minus total CAR Treg counts, as gated in (A). **(C)** Immunofluorescence staining for hCD45 on a section from a mouse that received a saline (PBS) injection. The section contains the human graft and the adjacent mouse skin.

**Supplemental Table 1.** Summary of p values showing CAR Tregs that had significantly higher relative binding to denoted HLA alleles compared with beads only (supporting data in Figure 3E). Two-way ANOVA and Dunnett's multiple comparisons test.

| <b>HLA-A*02:01</b> |        | <b>HLA-A*69:01</b> |        | <b>HLA-A*03:01</b> |        | <b>HLA-A*33:01</b> |        |
|--------------------|--------|--------------------|--------|--------------------|--------|--------------------|--------|
| mA2-CAR            | 0.0001 | mA2-CAR            | 0.0001 | mA2-CAR            | 0.0315 | mA2-CAR            | 0.0019 |
| H4k4               | 0.0006 | H4k2               | 0.0001 | <b>HLA-A*25:01</b> |        | <b>HLA-A*36:01</b> |        |
| H4k2               | 0.0001 | H5k2               | 0.0001 | mA2-CAR            | 0.0001 | mA2-CAR            | 0.0035 |
| H5k2               | 0.0001 | H1k2               | 0.0001 | H1k2               | 0.0130 | H1k2               | 0.0082 |
| H1k2               | 0.0001 | H3k4               | 0.0013 | <b>HLA-A*29:02</b> |        | <b>HLA-A*68:01</b> |        |
| H3k4               | 0.0001 | H2k2               | 0.0084 | mA2-CAR            | 0.0001 | mA2-CAR            | 0.0001 |
| H2k2               | 0.0001 | H5k3               | 0.0001 | <b>HLA-A*30:01</b> |        | H1k2               | 0.0001 |
| H5k3               | 0.0001 | H4k3               | 0.0001 | mA2-CAR            | 0.0001 | H5k2               | 0.0337 |
| H4k3               | 0.0001 | H6k2               | 0.0060 | <b>HLA-A*31:01</b> |        | H6k2               | 0.0009 |
| H6k2               | 0.0001 |                    |        | mA2-CAR            | 0.0001 |                    |        |
| H5k4               | 0.0001 |                    |        | H1k2               | 0.0077 |                    |        |

**Supplemental Table 2.** Primers used in qPCR analysis of Figure 7E.

| <b>Oligo name</b>  | <b>Direction</b> | <b>Oligo sequence (5' to 3')</b> |
|--------------------|------------------|----------------------------------|
| human <i>IL17</i>  | FWD              | TCA ACC CGA TTG TCC ACC AT       |
| human <i>IL17</i>  | RVS              | GAG TTT AGT CCG AAA TGA GGC TG   |
| human <i>IL6</i>   | FWD              | TCC AAA GAT GTA GCC GCC CCA      |
| human <i>IL6</i>   | RVS              | CCA GTG CCT CTT TGC TGC TTT CA   |
| human <i>IL1B</i>  | FWD              | CTG AGC TCG CCA GTG AAA TGA TG   |
| human <i>IL1B</i>  | RVS              | TGC TGT AGT GGT GGT CGG AGA      |
| human <i>DEFB4</i> | FWD              | ACC TGC CTT AAG AGT GGA GCC A    |
| human <i>DEFB4</i> | RVS              | ACA TGT CGC ACG TCT CTG ATG A    |
| human <i>IFNG</i>  | FWD              | TGC CCA GAG CAT CCA AAA GA       |
| human <i>IFNG</i>  | RVS              | TGT ATT GCT TTG CGT TGG AC       |
| human <i>TNFA</i>  | FWD              | AGG CGC TCC CCA AGA AGA CA       |
| human <i>TNFA</i>  | RVS              | GGG CTG ATT AGA GAG AGG TCC CT   |
|                    |                  |                                  |
| 18S ribosomal RNA  | FWD              | CAA GAC GGA CCA GAG CGA AA       |
| 18S ribosomal RNA  | RVS              | GGC GGG TCA TGG GAA TAA C        |
